# Supplementary material
Source: publisher figshare collection journal article supplement (https://brill.figshare.com/articles/dataset/_/1558256)
Supplement: Supplementary file 1 [file 1]

Beam Brook revisited: A molecular study of a historically introduced non-native amphibian (*Triturus carnifex*) and its limited introgression into native UK *Triturus cristatus* populations

Edward Brede

School of Biological Sciences, Museum Avenue, Cardiff University, CF10 3AX, UK

**Supplementary Figure S1**

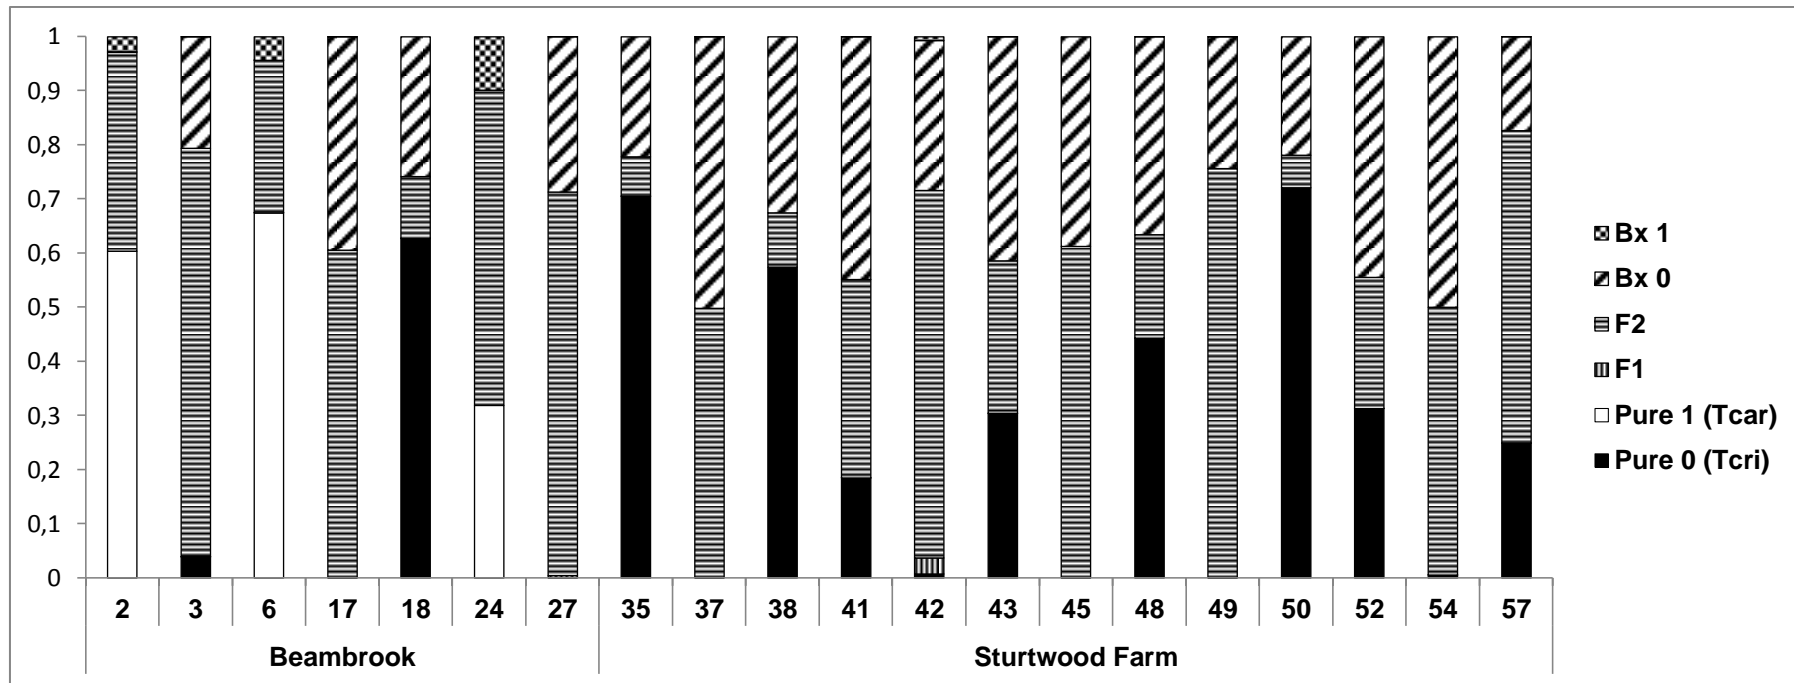

**Figure S1.** Beam Brook and Sturtwood Farm individuals unassignable/admixed at  $> 0.80$  posterior probability with NewHybrids Bayesian clustering.
