# Supplementary material
Source: publisher figshare collection journal article supplement (https://brill.figshare.com/articles/dataset/_/1558256)
Supplement: Supplementary file 2 [file 1]

Beam Brook revisited: A molecular study of a historically introduced  
non-native amphibian (*Triturus carnifex*) and its limited  
introgression into native UK *Triturus cristatus* populations

Edward Brede

School of Biological Sciences, Museum Avenue, Cardiff University, CF10 3AX, UK

**Supplementary Material**

**Table S3.** Posterior probability values (STRUCTURE) for newt individuals assigned to two clusters ( $K=2$ ) corresponding to *T. carnifex* (K1) and *T. cristatus* (K2). Bb=Beam Brook, SF=Sturtwood Farm, CPH=Capel Post House, followed by sample number, followed by sex (m=male, f=female, j=juvenile).

|       | <u>K1</u> | <u>K2</u> |        | <u>K1</u> | <u>K2</u> |
|-------|-----------|-----------|--------|-----------|-----------|
| Bb01f | 0.993     | 0.007     | SF14f  | 0.000     | 1.000     |
| Bb02f | 1.000     | 0.000     | SF15f  | 0.000     | 1.000     |
| Bb03f | 0.371     | 0.629     | SF16f  | 0.696     | 0.304     |
| Bb04f | 1.000     | 0.000     | SF17f  | 0.000     | 1.000     |
| Bb05f | 1.000     | 0.000     | SF18m  | 0.000     | 1.000     |
| Bb06f | 1.000     | 0.000     | SF19m  | 0.009     | 0.991     |
| Bb07f | 1.000     | 0.000     | SF20m  | 0.978     | 0.022     |
| Bb08f | 1.000     | 0.000     | SF21m  | 0.000     | 1.000     |
| Bb09f | 1.000     | 0.000     | SF22m  | 0.000     | 1.000     |
| Bb10f | 1.000     | 0.000     | SF23m  | 0.001     | 0.999     |
| Bb11f | 0.997     | 0.003     | SF24m  | 0.000     | 1.000     |
| Bb12f | 1.000     | 0.000     | SF25m  | 0.029     | 0.971     |
| Bb13f | 1.000     | 0.000     | SF26m  | 0.000     | 1.000     |
| Bb14f | 0.999     | 0.001     | SF27m  | 0.000     | 1.000     |
| Bb15f | 0.996     | 0.004     | SF28m  | 0.007     | 0.993     |
| Bb16f | 1.000     | 0.000     | SF29m  | 0.000     | 1.000     |
| Bb17f | 0.726     | 0.274     | SF30m  | 0.000     | 1.000     |
| Bb18m | 0.001     | 0.999     | SF31m  | 0.000     | 1.000     |
| Bb19m | 1.000     | 0.000     | SF32m  | 0.000     | 1.000     |
| Bb20m | 0.000     | 1.000     | SF33m  | 0.000     | 1.000     |
| Bb21m | 0.958     | 0.042     | SF34m  | 0.000     | 1.000     |
| Bb22m | 1.000     | 0.000     | SF35j  | 0.000     | 1.000     |
| Bb23m | 1.000     | 0.000     |        |           |           |
| Bb24j | 1.000     | 0.000     | CPH01f | 0.000     | 1.000     |
| Bb25j | 1.000     | 0.000     | CPH02f | 0.000     | 1.000     |
| Bb26j | 0.972     | 0.028     | CPH03f | 0.000     | 1.000     |
| Bb27j | 0.983     | 0.017     | CPH04f | 0.000     | 1.000     |
| Bb28j | 1.000     | 0.000     | CPH05f | 0.000     | 1.000     |
| Bb29j | 1.000     | 0.000     | CPH06f | 0.000     | 1.000     |
|       |           |           | CPH07f | 0.000     | 1.000     |
| SF01f | 0.000     | 1.000     | CPH08f | 0.000     | 1.000     |
| SF02f | 0.000     | 1.000     | CPH09f | 0.000     | 1.000     |
| SF03f | 1.000     | 0.000     | CPH10f | 0.000     | 1.000     |
| SF04f | 0.000     | 1.000     | CPH11m | 0.000     | 1.000     |
| SF05f | 0.000     | 1.000     | CPH12m | 0.000     | 1.000     |
| SF06f | 0.000     | 1.000     | CPH13m | 0.000     | 1.000     |
| SF07f | 0.000     | 1.000     | CPH14m | 0.000     | 1.000     |
| SF08f | 0.261     | 0.739     | CPH15m | 0.000     | 1.000     |
| SF09f | 0.001     | 0.999     | CPH16m | 0.000     | 1.000     |
| SF10f | 0.000     | 1.000     | CPH17m | 0.000     | 1.000     |
| SF11f | 0.000     | 1.000     | CPH18j | 0.000     | 1.000     |
| SF12f | 0.001     | 0.999     | CPH19j | 0.000     | 1.000     |
| SF13f | 0.655     | 0.345     | CPH20j | 0.000     | 1.000     |
