# Supplementary material
Source: publisher figshare collection journal article supplement (https://brill.figshare.com/articles/dataset/_/1558256)
Supplement: Supplementary file 3 [file 1]

Beam Brook revisited: A molecular study of a historically introduced  
non-native amphibian (*Triturus carnifex*) and its limited  
introgression into native UK *Triturus cristatus* populations

Edward Brede

School of Biological Sciences, Museum Avenue, Cardiff University, CF10 3AX, UK

**Supplementary Material**

**Table S4.** Posterior probability values (NewHybrids) for Beam Brook and Sturtwood Farm individuals assigned to inferred hybrid classes. Bb=Beam Brook, SF=Sturtwood Farm, followed by sample number, followed by sex (m=male, f=female, j=juvenile).

Pure0(Tcri) = *T. cristatus*, Pure1(Tcar) = *T. carnifex*, F1 = F1 hybrid, F2 = F2 hybrid, Bx0 = *T. cristatus* backcross, Bx1 = *T. carnifex* backcross.

|       | Pure 0 (Tcri) | Pure 1 (Tcar) | F1    | F2    | Bx 0  | Bx 1  |
|-------|---------------|---------------|-------|-------|-------|-------|
| Bb01f | 0.000         | 0.000         | 0.000 | 0.991 | 0.009 | 0.000 |
| Bb02f | 0.000         | 0.603         | 0.000 | 0.368 | 0.000 | 0.029 |
| Bb03f | 0.039         | 0.000         | 0.000 | 0.754 | 0.207 | 0.000 |
| Bb04f | 0.000         | 0.042         | 0.000 | 0.930 | 0.001 | 0.027 |
| Bb05f | 0.000         | 0.010         | 0.000 | 0.944 | 0.002 | 0.044 |
| Bb06f | 0.000         | 0.675         | 0.000 | 0.281 | 0.000 | 0.044 |
| Bb07f | 0.000         | 0.015         | 0.000 | 0.857 | 0.000 | 0.128 |
| Bb08f | 0.000         | 0.807         | 0.000 | 0.171 | 0.000 | 0.022 |
| Bb09f | 0.000         | 0.001         | 0.000 | 0.972 | 0.000 | 0.027 |
| Bb10f | 0.000         | 0.043         | 0.000 | 0.909 | 0.000 | 0.048 |
| Bb11f | 0.000         | 0.001         | 0.020 | 0.840 | 0.101 | 0.038 |
| Bb12f | 0.000         | 0.941         | 0.000 | 0.048 | 0.000 | 0.011 |
| Bb13f | 0.000         | 0.009         | 0.003 | 0.901 | 0.002 | 0.085 |
| Bb14f | 0.000         | 0.000         | 0.000 | 0.982 | 0.002 | 0.016 |
| Bb15f | 0.000         | 0.000         | 0.029 | 0.838 | 0.106 | 0.027 |
| Bb16f | 0.000         | 0.001         | 0.000 | 0.995 | 0.001 | 0.003 |
| Bb17f | 0.000         | 0.000         | 0.000 | 0.605 | 0.395 | 0.000 |
| Bb18m | 0.627         | 0.000         | 0.000 | 0.115 | 0.258 | 0.000 |
| Bb19m | 0.000         | 0.969         | 0.000 | 0.024 | 0.000 | 0.007 |
| Bb20m | 0.998         | 0.000         | 0.000 | 0.000 | 0.002 | 0.000 |
| Bb21m | 0.000         | 0.000         | 0.004 | 0.856 | 0.107 | 0.033 |
| Bb22m | 0.000         | 0.960         | 0.000 | 0.031 | 0.000 | 0.009 |
| Bb23m | 0.000         | 0.971         | 0.000 | 0.023 | 0.000 | 0.006 |
| Bb24j | 0.000         | 0.318         | 0.000 | 0.583 | 0.000 | 0.099 |
| Bb25j | 0.000         | 0.001         | 0.000 | 0.995 | 0.001 | 0.003 |
| Bb26j | 0.000         | 0.000         | 0.001 | 0.929 | 0.068 | 0.002 |
| Bb27j | 0.000         | 0.000         | 0.004 | 0.709 | 0.286 | 0.001 |
| Bb28j | 0.000         | 0.976         | 0.000 | 0.020 | 0.000 | 0.004 |
| Bb29j | 0.000         | 0.924         | 0.000 | 0.062 | 0.000 | 0.014 |
| SF01f | 0.994         | 0.000         | 0.000 | 0.001 | 0.005 | 0.000 |
| SF02f | 0.996         | 0.000         | 0.000 | 0.000 | 0.004 | 0.000 |
| SF03f | 0.000         | 0.001         | 0.000 | 0.973 | 0.000 | 0.026 |
| SF04f | 0.945         | 0.000         | 0.000 | 0.006 | 0.049 | 0.000 |
| SF05f | 0.950         | 0.000         | 0.000 | 0.006 | 0.044 | 0.000 |
| SF06f | 0.705         | 0.000         | 0.000 | 0.072 | 0.223 | 0.000 |
| SF07f | 0.999         | 0.000         | 0.000 | 0.000 | 0.001 | 0.000 |
| SF08f | 0.000         | 0.000         | 0.001 | 0.497 | 0.502 | 0.000 |
| SF09f | 0.574         | 0.000         | 0.000 | 0.101 | 0.325 | 0.000 |
| SF10f | 0.998         | 0.000         | 0.000 | 0.000 | 0.002 | 0.000 |
| SF11f | 0.984         | 0.000         | 0.000 | 0.003 | 0.013 | 0.000 |
| SF12f | 0.185         | 0.000         | 0.000 | 0.366 | 0.449 | 0.000 |
| SF13f | 0.007         | 0.000         | 0.030 | 0.679 | 0.276 | 0.008 |
| SF14f | 0.304         | 0.000         | 0.000 | 0.282 | 0.414 | 0.000 |
| SF15f | 0.958         | 0.000         | 0.000 | 0.004 | 0.038 | 0.000 |
| SF16f | 0.000         | 0.000         | 0.000 | 0.612 | 0.388 | 0.000 |
| SF17f | 0.995         | 0.000         | 0.000 | 0.001 | 0.004 | 0.000 |
| SF18m | 0.995         | 0.000         | 0.000 | 0.001 | 0.004 | 0.000 |
| SF19m | 0.443         | 0.000         | 0.000 | 0.191 | 0.366 | 0.000 |
| SF20m | 0.000         | 0.000         | 0.001 | 0.755 | 0.244 | 0.000 |
| SF21m | 0.721         | 0.000         | 0.000 | 0.060 | 0.219 | 0.000 |
| SF22m | 0.891         | 0.000         | 0.000 | 0.016 | 0.093 | 0.000 |
| SF23m | 0.312         | 0.000         | 0.000 | 0.243 | 0.445 | 0.000 |
| SF24m | 0.997         | 0.000         | 0.000 | 0.000 | 0.003 | 0.000 |
| SF25m | 0.005         | 0.000         | 0.000 | 0.495 | 0.500 | 0.000 |
| SF26m | 0.920         | 0.000         | 0.000 | 0.010 | 0.070 | 0.000 |
| SF27m | 0.955         | 0.000         | 0.000 | 0.005 | 0.040 | 0.000 |
| SF28m | 0.249         | 0.000         | 0.000 | 0.577 | 0.174 | 0.000 |
| SF29m | 0.990         | 0.000         | 0.000 | 0.004 | 0.006 | 0.000 |
| SF30m | 0.998         | 0.000         | 0.000 | 0.000 | 0.002 | 0.000 |
| SF31m | 0.990         | 0.000         | 0.000 | 0.003 | 0.007 | 0.000 |
| SF32m | 0.994         | 0.000         | 0.000 | 0.001 | 0.005 | 0.000 |
| SF33m | 0.850         | 0.000         | 0.000 | 0.027 | 0.123 | 0.000 |
| SF34m | 0.996         | 0.000         | 0.000 | 0.001 | 0.003 | 0.000 |
| SF35j | 0.994         | 0.000         | 0.000 | 0.001 | 0.005 | 0.000 |
