# Supplementary material
Source: publisher figshare collection journal article supplement (https://brill.figshare.com/articles/dataset/_/1558256)
Supplement: Supplementary file 4 [file 1]

Beam Brook revisited: A molecular study of a historically introduced non-native  
amphibian (*Triturus carnifex*) and its limited introgression into native UK  
*Triturus cristatus* populations

Edward Brede

School of Biological Sciences, Museum Avenue, Cardiff University, CF10 3AX, UK

Supplementary Material

**Table S1.** Sample/collection site details, Genbank accession numbers and haplotype groupings.

| Species               | Genbank<br>ref number | Ref number<br>this study | Site no/<br>country of origin | Haplotype<br>Ref  |
|-----------------------|-----------------------|--------------------------|-------------------------------|-------------------|
| <i>T. cristatus</i> / | JQ290375              | Bb01f_A1                 | 1/Beambrook, Surrey, UK       | Tri1              |
| <i>T. carnifex</i> /  | JQ290376              | Bb02f_B1                 | 1/Beambrook, Surrey, UK       | Tri2              |
| Hybrids               | JQ290377              | Bb03f_C1                 | 1/Beambrook, Surrey, UK       | Tri2              |
|                       | JQ290378              | Bb04f_D1                 | 1/Beambrook, Surrey, UK       | Tri2              |
|                       | JQ290379              | Bb05f_E1                 | 1/Beambrook, Surrey, UK       | Tri3              |
|                       | JQ290380              | Bb06f_F1                 | 1/Beambrook, Surrey, UK       | Tri3              |
|                       | JQ290381              | Bb07f_G1                 | 1/Beambrook, Surrey, UK       | Tri2              |
|                       | JQ290382              | Bb08f_H1                 | 1/Beambrook, Surrey, UK       | Tri2              |
|                       | JQ290383              | Bb09f_A2                 | 1/Beambrook, Surrey, UK       | Tri4              |
|                       | JQ290384              | Bb10f_B2                 | 1/Beambrook, Surrey, UK       | Tri1              |
|                       | JQ290385              | Bb11f_C2                 | 1/Beambrook, Surrey, UK       | Tri5              |
|                       | JQ290386              | Bb12f_D2                 | 1/Beambrook, Surrey, UK       | Tri2              |
|                       | JQ290387              | Bb13f_E2                 | 1/Beambrook, Surrey, UK       | Tri2              |
|                       | JQ290388              | Bb14f_F2                 | 1/Beambrook, Surrey, UK       | Tri2              |
|                       | JQ290389              | Bb15f_G2                 | 1/Beambrook, Surrey, UK       | Tri2              |
|                       | JQ290390              | Bb16f_H2                 | 1/Beambrook, Surrey, UK       | Tri6              |
|                       | JQ290391              | Bb17f_A3                 | 1/Beambrook, Surrey, UK       | Tri1              |
|                       | <u>Msats only</u>     | <u>Bb18m</u>             | 1/Beambrook, Surrey, UK       | <u>Msats only</u> |
|                       | JQ290392              | Bb19m_C3                 | 1/Beambrook, Surrey, UK       | Tri4              |
|                       | JQ290393              | Bb20m_D3                 | 1/Beambrook, Surrey, UK       | Tri2              |
|                       | JQ290394              | Bb21m_E3                 | 1/Beambrook, Surrey, UK       | Tri7              |
|                       | JQ290395              | Bb22m_F3                 | 1/Beambrook, Surrey, UK       | Tri2              |
|                       | JQ290396              | Bb23m_G3                 | 1/Beambrook, Surrey, UK       | Tri2              |
|                       | JQ290397              | Bb24j_H3                 | 1/Beambrook, Surrey, UK       | Tri2              |
|                       | JQ290398              | Bb25j_A4                 | 1/Beambrook, Surrey, UK       | Tri2              |
|                       | JQ290399              | Bb26j_B4                 | 1/Beambrook, Surrey, UK       | Tri4              |
|                       | JQ290400              | Bb27j_C4                 | 1/Beambrook, Surrey, UK       | Tri2              |
|                       | JQ290401              | Bb28j_D4                 | 1/Beambrook, Surrey, UK       | Tri2              |
|                       | <u>Msats only</u>     | <u>Bb29j</u>             | 1/Beambrook, Surrey, UK       | <u>Msats only</u> |

|                                                          |                   |                      |                         |                   |
|----------------------------------------------------------|-------------------|----------------------|-------------------------|-------------------|
| <i>T. cristatus</i> /<br><i>T. carnifex</i> /<br>Hybrids | JQ290402          | CPH01f_A5            | 2/Capel, Surrey, UK     | Tri2              |
|                                                          | JQ290403          | CPH02f_B5            | 2/Capel, Surrey, UK     | Tri2              |
|                                                          | JQ290404          | CPH03f_C5            | 2/Capel, Surrey, UK     | Tri2              |
|                                                          | JQ290405          | CPH04f_D5            | 2/Capel, Surrey, UK     | Tri2              |
|                                                          | JQ290406          | CPH05f_E5            | 2/Capel, Surrey, UK     | Tri2              |
|                                                          | JQ290407          | CPH06f_F5            | 2/Capel, Surrey, UK     | Tri2              |
|                                                          | JQ290408          | CPH07f_G5            | 2/Capel, Surrey, UK     | Tri2              |
|                                                          | JQ290409          | CPH08f_H5            | 2/Capel, Surrey, UK     | Tri2              |
|                                                          | JQ290410          | CPH09f_A6            | 2/Capel, Surrey, UK     | Tri2              |
|                                                          | JQ290411          | CPH10f_B6            | 2/Capel, Surrey, UK     | Tri2              |
|                                                          | JQ290412          | CPH11m_C6            | 2/Capel, Surrey, UK     | Tri2              |
|                                                          | JQ290413          | CPH12m_D6            | 2/Capel, Surrey, UK     | Tri2              |
|                                                          | JQ290414          | CPH13m_E6            | 2/Capel, Surrey, UK     | Tri2              |
|                                                          | JQ290415          | CPH14m_F6            | 2/Capel, Surrey, UK     | Tri2              |
|                                                          | JQ290416          | CPH15m_G6            | 2/Capel, Surrey, UK     | Tri2              |
|                                                          | JQ290417          | CPH16m_H6            | 2/Capel, Surrey, UK     | Tri2              |
|                                                          | <u>Msats only</u> | <u>CPH17m</u>        | 2/Capel, Surrey, UK     | <u>Msats only</u> |
|                                                          | <u>Msats only</u> | <u>CPH18j-CPH20j</u> | 2/Capel, Surrey, UK     | <u>Msats only</u> |
| <i>T. cristatus</i> /<br><i>T. carnifex</i> /<br>Hybrids | JQ290437          | SF01f_A7             | 3/Sturtwood, Surrey, UK | Tri2              |
|                                                          | JQ290438          | SF02f_B7             | 3/Sturtwood, Surrey, UK | Tri2              |
|                                                          | JQ290439          | SF03f_C7             | 3/Sturtwood, Surrey, UK | Tri4              |
|                                                          | JQ290440          | SF04f_D7             | 3/Sturtwood, Surrey, UK | Tri2              |
|                                                          | JQ290441          | SF05f_E7             | 3/Sturtwood, Surrey, UK | Tri2              |
|                                                          | JQ290442          | SF06f_F7             | 3/Sturtwood, Surrey, UK | Tri2              |
|                                                          | JQ290443          | SF07f_G7             | 3/Sturtwood, Surrey, UK | Tri2              |
|                                                          | JQ290444          | SF08f_H7             | 3/Sturtwood, Surrey, UK | Tri3              |
|                                                          | JQ290445          | SF09f_A8             | 3/Sturtwood, Surrey, UK | Tri2              |
|                                                          | <u>Msats only</u> | <u>SF10f-SF17f</u>   | 3/Sturtwood, Surrey, UK | <u>Msats only</u> |
|                                                          | JQ290446          | SF18m_B8             | 3/Sturtwood, Surrey, UK | Tri2              |
|                                                          | JQ290447          | SF19m_C8             | 3/Sturtwood, Surrey, UK | Tri2              |
|                                                          | JQ290448          | SF20m_D8             | 3/Sturtwood, Surrey, UK | Tri2              |
|                                                          | JQ290449          | SF21m_E8             | 3/Sturtwood, Surrey, UK | Tri2              |
|                                                          | JQ290450          | SF22m_F8             | 3/Sturtwood, Surrey, UK | Tri2              |
|                                                          | JQ290451          | SF23m_G8             | 3/Sturtwood, Surrey, UK | Tri2              |
|                                                          | JQ290452          | SF24m_H8             | 3/Sturtwood, Surrey, UK | Tri2              |
|                                                          | JQ290453          | SF25m_A9             | 3/Sturtwood, Surrey, UK | Tri2              |
|                                                          | <u>Msats only</u> | <u>SF26m-SF35</u>    | 3/Sturtwood, Surrey, UK | <u>Msats only</u> |
| <i>T. cristatus</i>                                      | JQ290418          | Nb01f_D10            | 4/Newborough, UK        | Tri2              |
|                                                          | JQ290419          | Nb02f_E10            | 4/Newborough, UK        | Tri2              |
|                                                          | JQ290420          | Nb03f_F10            | 4/Newborough, UK        | Tri2              |
|                                                          | JQ290421          | Nb04f_G10            | 4/Newborough, UK        | Tri2              |
|                                                          | JQ290422          | Nb05f_H10            | 4/Newborough, UK        | Tri2              |
|                                                          | <u>Msats only</u> | <u>Nb06f-Nb13f</u>   | 4/Newborough, UK        | <u>Msats only</u> |
|                                                          | JQ290423          | Nb14m_A11            | 4/Newborough, UK        | Tri2              |
|                                                          | JQ290424          | Nb15m_B11            | 4/Newborough, UK        | Tri2              |
|                                                          | JQ290425          | Nb17m_D11            | 4/Newborough, UK        | Tri2              |
|                                                          | JQ290426          | Nb18m_E11            | 4/Newborough, UK        | Tri2              |
|                                                          | <u>Msats only</u> | <u>Nb19m-Nb35m</u>   | 4/Newborough, UK        | <u>Msats only</u> |
| <i>T. cristatus</i>                                      | JQ290427          | Pb01m_B9             | 5/Peterborough, UK      | Tri2              |
|                                                          | JQ290428          | Pb02m_C9             | 5/Peterborough, UK      | Tri2              |
|                                                          | JQ290429          | Pb03m_D9             | 5/Peterborough, UK      | Tri2              |
|                                                          | JQ290430          | Pb04m_E9             | 5/Peterborough, UK      | Tri2              |
|                                                          | JQ290431          | Pb05m_F9             | 5/Peterborough, UK      | Tri2              |
|                                                          | <u>Msats only</u> | <u>Pb06m-Pb07m</u>   | 5/Peterborough, UK      | <u>Msats only</u> |
|                                                          | <u>Msats only</u> | <u>Pb08j-Pb16j</u>   | 5/Peterborough, UK      | <u>Msats only</u> |
|                                                          | JQ290432          | Pb17f_G9             | 5/Peterborough, UK      | Tri2              |
|                                                          | JQ290433          | Pb18f_H9             | 5/Peterborough, UK      | Tri2              |
|                                                          | JQ290434          | Pb19f_A10            | 5/Peterborough, UK      | Tri2              |
|                                                          | JQ290435          | Pb20f_B10            | 5/Peterborough, UK      | Tri2              |
|                                                          | JQ290436          | Pb21f_C10            | 5/Peterborough, UK      | Tri2              |
|                                                          | <u>Msats only</u> | <u>Pb22f-Pb35f</u>   | 5/Peterborough, UK      | <u>Msats only</u> |
| <i>T. carnifex</i>                                       | JQ290454          | SG01f_F11            | 6/San Guisto, Italy     | Tri4              |

|                        |                   |                    |                     |                   |
|------------------------|-------------------|--------------------|---------------------|-------------------|
|                        | JQ290455          | SG02f_G11          | 6/San Guisto, Italy | Tri4              |
|                        | JQ290456          | SG03f_H11          | 6/San Guisto, Italy | Tri4              |
|                        | JQ290457          | SG05f_B12          | 6/San Guisto, Italy | Tri4              |
|                        | <u>Msats only</u> | <u>SG06f-SG07f</u> | 6/San Guisto, Italy | <u>Msats only</u> |
|                        | JQ290458          | SG08m_C12          | 6/San Guisto, Italy | Tri4              |
|                        | JQ290459          | SG09m_D12          | 6/San Guisto, Italy | Tri4              |
|                        | JQ290460          | SG10m_E12          | 6/San Guisto, Italy | Tri4              |
|                        | JQ290461          | SG11m_F12          | 6/San Guisto, Italy | Tri4              |
|                        | JQ290462          | SG12m_G12          | 6/San Guisto, Italy | Tri4              |
|                        | <u>Msats only</u> | <u>SG13m-SG23m</u> | 6/San Guisto, Italy | <u>Msats only</u> |
|                        | <u>Msats only</u> | <u>SG24i-SG32j</u> | 6/San Guisto, Italy | <u>Msats only</u> |
| <i>T. pygmaeus</i>     | gi 110704178      | gi 110704178       | Spain               | Tri8              |
|                        | gi 110704176      | gi 110704176       | Spain               | Tri8              |
| <i>T. carnifex</i>     | gi 110704106      | gi 110704106       | Slovenia            | Tri9              |
|                        | gi 110704104      | gi 110704104       | Italy               | Tri10             |
|                        | gi 110704102      | gi 110704102       | Italy               | Tri11             |
|                        | gi 110704100      | gi 110704100       | Italy               | Tri12             |
|                        | gi 110704098      | gi 110704098       | Italy               | Tri12             |
|                        | gi 110704096      | gi 110704096       | Slovenia            | Tri13             |
| <i>T. dobrogicus</i>   | gi 110704130      | gi 110704130       | Bulgaria            | Tri14             |
|                        | gi 110704128      | gi 110704128       | Hungary             | Tri14             |
|                        | gi 110704126      | gi 110704126       | Hungary             | Tri15             |
|                        | gi 110704124      | gi 110704124       | Romania             | Tri16             |
| <i>T. ivanbureschi</i> | gi 110704156      | gi 110704156       | Serbia              | Tri17             |
|                        | gi 110704154      | gi 110704154       | Serbia              | Tri17             |
|                        | gi 110704152      | gi 110704152       | Serbia              | Tri18             |
|                        | gi 110704150      | gi 110704150       | Turkey              | Tri19             |
|                        | gi 110704148      | gi 110704148       | Turkey              | Tri20             |
|                        | gi 110704146      | gi 110704146       | Turkey              | Tri21             |
|                        | gi 110704144      | gi 110704144       | Turkey              | Tri22             |
| <i>T. macedonicus</i>  | gi 110704108      | gi 110704108       | Greece              | Tri23             |
|                        | gi 110704110      | gi 110704110       | Greece              | Tri24             |
|                        | gi 110704112      | gi 110704112       | Greece              | Tri25             |
|                        | gi 110704114      | gi 110704114       | Greece              | Tri25             |
| <i>T. marmoratus</i>   | gi 110704162      | gi 110704162       | France              | Tri26             |
|                        | gi 110704160      | gi 110704160       | France              | Tri26             |
|                        | gi 110704158      | gi 110704158       | France              | Tri26             |

**Licence details :**

Sites 1 – 3 (E.N # 20100372), (Release licence –E.N # NNR/2009/0022)

Site 4 (C.C.W #18138/OTH/SCA/2009)

Site 5 (E.N # 20100372)

Site 6 (DPR 357/97)

---
