# Supplementary material
Source: publisher figshare collection journal article supplement (https://brill.figshare.com/articles/dataset/_/1558256)
Supplement: Supplementary file 5 [file 1]

Beam Brook revisited: A molecular study of a historically introduced non-native  
amphibian (*Triturus carnifex*) and its limited introgression into native UK  
*Triturus cristatus* populations

Edward Brede

School of Biological Sciences, Museum Avenue, Cardiff University, CF10 3AX, UK

Supplementary Material

**Table S2.** Genetic diversity for seven microsatellite loci and CytB (*T. cristatus*/*T. carnifex*).

|                                | Beam Brook                               | Sturtwood Fm.       | San Giusto                | Capel               | Newborough.         | Peterborough              |
|--------------------------------|------------------------------------------|---------------------|---------------------------|---------------------|---------------------|---------------------------|
| <b><u>Allelic Richness</u></b> |                                          |                     |                           |                     |                     |                           |
| <b><u>(AR)</u></b>             |                                          |                     |                           |                     |                     |                           |
| TCM414                         | 2.700                                    | 1.981               | 2.000                     | 1.000               | 1.000               | 1.000                     |
| TCM496                         | 2.000                                    | 1.608               | 2.000                     | 1.000               | 1.000               | 1.000                     |
| TCM417                         | 4.423                                    | 3.762               | 1.000                     | 2.000               | 2.000               | 1.996                     |
| TCM96y                         | 2.978                                    | 2.848               | 1.419                     | 1.000               | 1.000               | 1.000                     |
| TCRI35                         | 10.531                                   | 8.686               | 2.000                     | 5.607               | 3.997               | 6.891                     |
| TCM327                         | 4.512                                    | 3.337               | 1.000                     | 2.000               | 1.998               | 2.000                     |
| TCRI46                         | 8.315                                    | 8.643               | 2.000                     | 4.879               | 4.372               | 7.862                     |
| <b><u>Mean</u></b>             | <b><u>5.065</u></b>                      | <b><u>4.409</u></b> | <b><u>1.631</u></b>       | <b><u>2.498</u></b> | <b><u>2.195</u></b> | <b><u>3.107</u></b>       |
| <b><u>Private alleles</u></b>  |                                          |                     |                           |                     |                     |                           |
| <b><u>(PA)</u></b>             |                                          |                     |                           |                     |                     |                           |
| TCM414                         | 118(0.034)                               |                     |                           |                     |                     |                           |
| TCM496                         |                                          |                     | 173(0.484)                |                     |                     |                           |
| TCM417                         | 178(0.017)                               |                     |                           |                     |                     |                           |
| TCM96y                         |                                          |                     |                           |                     |                     |                           |
| TCRI35                         | 219(0.023)/<br>223(0.045)/<br>239(0.045) |                     | 181(0.500)/<br>207(0.500) |                     |                     |                           |
| TCM327                         | 194(0.017)/<br>198(0.017)                |                     |                           |                     |                     |                           |
| TCRI46                         | 262(0.042)                               | 286(0.047)          |                           |                     |                     | 284(0.030)/<br>302(0.114) |
| <b>Total</b>                   | <b>8</b>                                 | <b>1</b>            | <b>3</b>                  | <b>0</b>            | <b>0</b>            | <b>2</b>                  |

**Gene diversity****(He)**

|             |                     |                     |                     |                     |                     |                     |
|-------------|---------------------|---------------------|---------------------|---------------------|---------------------|---------------------|
| TCM414      | 0.489               | 0.205               | 0.500               | 0.000               | 0.000               | 0.000               |
| TCM496      | 0.344               | 0.056               | 0.500               | 0.000               | 0.000               | 0.000               |
| TCM417      | 0.704               | 0.620               | 0.000               | 0.482               | 0.494               | 0.268               |
| TCM96y      | 0.526               | 0.360               | 0.032               | 0.000               | 0.000               | 0.000               |
| TCRI35      | 0.889               | 0.862               | 0.500               | 0.746               | 0.738               | 0.831               |
| TCM327      | 0.571               | 0.456               | 0.000               | 0.329               | 0.297               | 0.492               |
| TCRI46      | 0.880               | 0.881               | 0.333               | 0.697               | 0.711               | 0.827               |
| <b>Mean</b> | <b><u>0.629</u></b> | <b><u>0.491</u></b> | <b><u>0.266</u></b> | <b><u>0.322</u></b> | <b><u>0.320</u></b> | <b><u>0.345</u></b> |

**Fis**

|            |                     |                     |                      |                      |                     |                      |
|------------|---------------------|---------------------|----------------------|----------------------|---------------------|----------------------|
| TCM414     | -0.481              | -0.115              | -1.000               | NA                   | NA                  | NA                   |
| TCM496     | 0.169               | -0.015              | -0.938               | NA                   | NA                  | NA                   |
| TCM417     | -0.077              | 0.170               | NA                   | 0.066                | 0.285               | -0.172               |
| TCM96y     | 0.148               | -0.033              | 0.000                | NA                   | NA                  | NA                   |
| TCRI35     | 0.488               | 0.01                | -1.000               | -0.206               | -0.036              | 0.071                |
| TCM327     | -0.148              | -0.064              | NA                   | 0.088                | 0.405               | 0.014                |
| TCRI46     | 0.763               | 0.113               | 0.769                | 0.068                | -0.034              | -0.071               |
| <b>All</b> | <b><u>0.197</u></b> | <b><u>0.043</u></b> | <b><u>-0.650</u></b> | <b><u>-0.020</u></b> | <b><u>0.094</u></b> | <b><u>-0.016</u></b> |

**Haplotype.div.****(h)**

|  |                     |                    |       |       |       |       |
|--|---------------------|--------------------|-------|-------|-------|-------|
|  | 0.640<br>(+/-0.098) | 0.230<br>(+/-0.12) | 0.000 | 0.000 | 0.000 | 0.000 |
|--|---------------------|--------------------|-------|-------|-------|-------|

**No. poly loci****(s)**

|  |    |    |   |   |   |   |
|--|----|----|---|---|---|---|
|  | 53 | 45 | 0 | 0 | 0 | 0 |
|--|----|----|---|---|---|---|

**Nucleotide div.****(π)**

|  |                     |                    |       |       |       |       |
|--|---------------------|--------------------|-------|-------|-------|-------|
|  | 0.040<br>(+/-0.018) | 0.020<br>(+/-0.01) | 0.000 | 0.000 | 0.000 | 0.000 |
|--|---------------------|--------------------|-------|-------|-------|-------|

**Tajimas D**

|  |       |        |       |       |       |       |
|--|-------|--------|-------|-------|-------|-------|
|  | 1.293 | -1.089 | 0.000 | 0.000 | 0.000 | 0.000 |
|--|-------|--------|-------|-------|-------|-------|

**Fus Fs**

|  |        |        |     |     |     |     |
|--|--------|--------|-----|-----|-----|-----|
|  | 12.442 | 11.789 | n/p | n/p | n/p | n/p |
|--|--------|--------|-----|-----|-----|-----|

**No. of****individual**

|  |    |    |   |    |   |    |
|--|----|----|---|----|---|----|
|  | 27 | 17 | 9 | 16 | 9 | 10 |
|--|----|----|---|----|---|----|

**No of****haplotype**

|  |   |   |   |   |   |   |
|--|---|---|---|---|---|---|
|  | 7 | 3 | 1 | 1 | 1 | 1 |
|--|---|---|---|---|---|---|
